# Supplementary material
Source: PubMed Central journal article supplement (PMC1860726)
Supplement: heart_92_7_987__1.pdf [file heart_92_7_987__1.pdf]

## Differential diagnosis of elevated troponins (ht71282)

S Korff, HA Katus, E Giannitsis

### Web only refs

1. Heidenreich PA, Alloggiamento T, Melsop K, *et al.* The prognostic value of troponin in patients with non-ST elevation acute coronary syndromes: a meta-analysis. *J Am Coll Cardiol* 2001;**38**:478–85.
2. Kontos MC, Fritz LM, Anderson FP, *et al.* Impact of the troponin standard on the prevalence of acute myocardial infarction. *Am Heart J* 2003;**146**:446–52.
3. Ohtani T, Ueda Y, Shimizu M, *et al.* Association between cardiac troponin T elevation and angiographic morphology of culprit lesion in patients with non-ST-segment elevation acute coronary syndrome. *Am Heart J* 2005;**150**:227–33.
4. Morrow DA, Cannon CP, Rifai N, *et al.* Ability of minor elevations of troponins I and T to predict benefit from an early invasive strategy in patients with unstable angina and non-ST elevation myocardial infarction: results from a randomized trial. *Jama* 2001;**286**:2405–12.
5. Nageh T, Sherwood RA, Harris BM, *et al.* Prognostic role of cardiac troponin I after percutaneous coronary intervention in stable coronary disease. *Heart* 2005;**91**:1181–5.
6. Okmen E, Kasikcioglu H, Sanli A, *et al.* Correlations between cardiac troponin I, cardiac troponin T, and creatine phosphokinase MB elevation following successful percutaneous coronary intervention and prognostic value of each marker. *J Invasive Cardiol* 2005;**17**:63–7.
7. Ricciardi MJ, Wu E, Davidson CJ, *et al.* Visualization of discrete microinfarction after percutaneous coronary intervention associated with mild creatine kinase-MB elevation. *Circulation* 2001;**103**:2780–3.
8. Cavallini C, Savonitto S, Violini R, *et al.* Impact of the elevation of biochemical markers of myocardial damage on long-term mortality after percutaneous coronary intervention: results of the CK-MB and PCI study. *Eur Heart J* 2005;**26**:1494–8. Epub 2005 Mar 1.
9. Etievent JP, Chocron S, Toubin G, *et al.* Use of cardiac troponin I as a marker of perioperative myocardial ischemia. *Ann Thorac Surg* 1995;**59**:1192–4.
10. Fellahi JL, Gue X, Richomme X, *et al.* Short- and long-term prognostic value of postoperative cardiac troponin I concentration in patients undergoing coronary artery bypass grafting. *Anesthesiology* 2003;**99**:270–4.
11. ver Elst KM, Spapen HD, Nguyen DN, *et al.* Cardiac troponins I and T are biological markers of left ventricular dysfunction in septic shock. *Clin Chem* 2000;**46**:650–7.
12. Arlati S, Brenna S, Prencipe L, *et al.* Myocardial necrosis in ICU patients with acute non-cardiac disease: a prospective study. *Intensive Care Med* 2000;**26**:31–7. 22.
13. Pruszczyk P, Bochowicz A, Torbicki A, *et al.* Cardiac troponin T monitoring identifies high-risk group of normotensive patients with acute pulmonary embolism. *Chest* 2003;**123**:1947–52.
14. Mehta NJ, Jani K, Khan IA. Clinical usefulness and prognostic value of elevated cardiac troponin I levels in acute pulmonary embolism. *Am Heart J* 2003;**145**:821–5.
15. Kostrubiec M, Pruszczyk P, Bochowicz A, *et al.* Biomarker-based risk assessment model in acute pulmonary embolism. *Eur Heart J* 2005;**23**:23.

16. Kasper W, Konstantinides S, Geibel A, *et al.* Prognostic significance of right ventricular afterload stress detected by echocardiography in patients with clinically suspected pulmonary embolism. *Heart* 1997;**77**:346–9.
17. Binder L, Pieske B, Olschewski M, *et al.* N-terminal pro-brain natriuretic peptide or troponin testing followed by echocardiography for risk stratification of acute pulmonary embolism. *Circulation* 2005;**112**:1573–9. Epub 2005 Sep 6.
18. Schaper J, Froede R, Hein S, *et al.* Impairment of the myocardial ultrastructure and changes of the cytoskeleton in dilated cardiomyopathy. *Circulation* 1991;**83**:504–14.
19. Missov E, Calzolari C, Pau B. Circulating cardiac troponin I in severe congestive heart failure. *Circulation* 1997;**96**:2953–8.
20. La Vecchia L, Mezzena G, Ometto R, *et al.* Detectable serum troponin I in patients with heart failure of nonmyocardial ischemic origin. *Am J Cardiol* 1997;**80**:88–90.
21. Setsuta K, Seino Y, Takahashi N, *et al.* Clinical significance of elevated levels of cardiac troponin T in patients with chronic heart failure. *Am J Cardiol* 1999;**84**:608–11, A9.
22. Perna ER, Macin SM, Parras JI, *et al.* Cardiac troponin T levels are associated with poor short- and long-term prognosis in patients with acute cardiogenic pulmonary edema. *Am Heart J* 2002;**143**:814–20.
23. Sato Y, Yamada T, Taniguchi R, *et al.* Persistently increased serum concentrations of cardiac troponin T in patients with idiopathic dilated cardiomyopathy are predictive of adverse outcomes. *Circulation* 2001;**103**:369–74.
24. Rifai N, Douglas PS, O'Toole M, *et al.* Cardiac troponin T and I, echocardiographic [correction of electrocardiographic] wall motion analyses, and ejection fractions in athletes participating in the Hawaii Ironman Triathlon. *Am J Cardiol* 1999;**83**:1085–9.
25. Urhausen A, Scharhag J, Herrmann M, *et al.* Clinical significance of increased cardiac troponins T and I in participants of ultra-endurance events. *Am J Cardiol* 2004;**94**:696–8.
26. Noakes TD, Opie LH, Rose AG, *et al.* Autopsy-proved coronary atherosclerosis in marathon runners. *N Engl J Med* 1979;**301**:86–9.
27. Noakes TD. Heart disease in marathon runners: a review. *Med Sci Sports Exerc* 1987;**19**:187–94.
28. Imazio M, Demichelis B, Cecchi E, *et al.* Cardiac troponin I in acute pericarditis. *J Am Coll Cardiol* 2003;**42**:2144–8.
29. Bonnefoy E, Godon P, Kirkorian G, *et al.* Serum cardiac troponin I and ST-segment elevation in patients with acute pericarditis. *Eur Heart J* 2000;**21**:832–6.
30. Smith SC, Ladenson JH, Mason JW, *et al.* Elevations of cardiac troponin I associated with myocarditis. Experimental and clinical correlates. *Circulation* 1997;**95**:163–8.
31. Lauer B, Niederau C, Kuhl U, *et al.* Cardiac troponin T in patients with clinically suspected myocarditis. *J Am Coll Cardiol* 1997;**30**:1354–9.
32. Yeh ET, Tong AT, Lenihan DJ, *et al.* Cardiovascular complications of cancer therapy: diagnosis, pathogenesis, and management. *Circulation* 2004;**109**:3122–31.
33. Cardinale D, Sandri MT, Martinoni A, *et al.* Left ventricular dysfunction predicted by early troponin I release after high-dose chemotherapy. *J Am Coll Cardiol* 2000;**36**:517–22.

34. Sparano JA, Brown DL, Wolff AC. Predicting cancer therapy-induced cardiotoxicity: the role of troponins and other markers. *Drug Saf* 2002;**25**:301–11.
35. Madrid AH, del Rey JM, Rubi J, *et al.* Biochemical markers and cardiac troponin I release after radiofrequency catheter ablation: approach to size of necrosis. *Am Heart J* 1998;**136**:948–55.
36. Kosior DA, Opolski G, Tadeusiak W, *et al.* Serum troponin I and myoglobin after monophasic versus biphasic transthoracic shocks for cardioversion of persistent atrial fibrillation. *Pacing Clin Electrophysiol* 2005;**28**:S128–32.
37. Neumayr G, Hagn C, Ganzer H, *et al.* Plasma levels of troponin T after electrical cardioversion of atrial fibrillation and flutter. *Am J Cardiol* 1997;**80**:1367–9.
38. Goktekin O, Melek M, Gorenek B, *et al.* Cardiac troponin T and cardiac enzymes after external transthoracic cardioversion of ventricular arrhythmias in patients with coronary artery disease. *Chest* 2002;**122**:2050–4.
39. Dispenzieri A, Kyle RA, Gertz MA, *et al.* Survival in patients with primary systemic amyloidosis and raised serum cardiac troponins. *Lancet* 2003;**361**:1787–9.
40. Zimmermann R, Baki S, Dengler TJ, *et al.* Troponin T release after heart transplantation. *Br Heart J* 1993;**69**:395–8.
41. Labarrere CA, Nelson DR, Cox CJ, *et al.* Cardiac-specific troponin I levels and risk of coronary artery disease and graft failure following heart transplantation. *Jama* 2000;**284**:457–64.
42. Jackson L, Stewart A. Best evidence topic report. Use of troponin for the diagnosis of myocardial contusion after blunt chest trauma. *Emerg Med J* 2005;**22**:193–5.
43. Edouard AR, Felten ML, Hebert JL, *et al.* Incidence and significance of cardiac troponin I release in severe trauma patients. *Anesthesiology* 2004;**101**:1262–8.
44. Velmahos GC, Karaiskakis M, Salim A, *et al.* Normal electrocardiography and serum troponin I levels preclude the presence of clinically significant blunt cardiac injury. *J Trauma* 2003;**54**:45–50; discussion 50–1.
45. Ooi DS, Zimmerman D, Graham J, *et al.* Cardiac troponin T predicts long-term outcomes in hemodialysis patients. *Clin Chem* 2001;**47**:412–7.
46. Hojs R, Ekart R, Hojs Fabjan T, *et al.* Cardiac troponin T (cTnT) in hemodialysis patients with asymptomatic and symptomatic atherosclerosis. *Arch Med Res* 2005;**36**:367–71.
47. Apple FS, Sharkey SW, Hoefft P, *et al.* Prognostic value of serum cardiac troponin I and T in chronic dialysis patients: a 1-year outcomes analysis. *Am J Kidney Dis* 1997;**29**:399–403.
48. Ooi DS, Veinot JP, Wells GA, *et al.* Increased mortality in hemodialyzed patients with elevated serum troponin T: a one-year outcome study. *Clin Biochem* 1999;**32**:647–52.
49. Willging S, Keller F, Steinbach G. Specificity of cardiac troponins I and T in renal disease. *Clin Chem Lab Med* 1998;**36**:87–92.
50. Katrukha AG, Bereznikova AV, Esakova TV, *et al.* Troponin I is released in bloodstream of patients with acute myocardial infarction not in free form but as complex. *Clin Chem* 1997;**43**:1379–85.
51. Katrukha A, Bereznikova A, Filatov V, *et al.* Biochemical factors influencing measurement of cardiac troponin I in serum. *Clin Chem Lab Med* 1999;**37**:1091–5.

52. McLaurin MD, Apple FS, Voss EM, *et al.* Cardiac troponin I, cardiac troponin T, and creatine kinase MB in dialysis patients without ischemic heart disease: evidence of cardiac troponin T expression in skeletal muscle. *Clin Chem* 1997;**43**:976–82.
53. Fredericks S, Bainbridge K, Murray JF, *et al.* Measurement of cardiac troponin I in striated muscle using three experimental methods. *Ann Clin Biochem* 2003;**40**:244–8.
54. Iliou MC, Fumeron C, Benoit MO, *et al.* Factors associated with increased serum levels of cardiac troponins T and I in chronic haemodialysis patients: Chronic Haemodialysis And New Cardiac Markers Evaluation (CHANCE) study. *Nephrol Dial Transplant* 2001;**16**:1452–8.
55. Diris JH, Hackeng CM, Kooman JP, *et al.* Impaired renal clearance explains elevated troponin T fragments in hemodialysis patients. *Circulation* 2004;**109**:23-5. Epub 2003 Dec 22.
